# Supplementary material for: Knowledge, attitude, and practice of healthcare workers on early gastrointestinal cancer in China
Source: Front Public Health. 2023 Jul 6;11:1191699. doi: 10.3389/fpubh.2023.1191699 (PMC10357471; doi:10.3389/fpubh.2023.1191699)
Supplement: Supplementary file 3 [file Table_3.XLSX]

## Sheet: Factor 
Knowledge	Factor	Eigenvalue	Difference	Proportion	Cumulative		Variable	Factor1	Factor2	Factor3	Factor4	Uniqueness		Attitude	Factor	Eigenvalue	Difference	Proportion	Cumulative		Variable	Factor1	Uniqueness		Practice	Factor	Eigenvalue	Difference	Proportion	Cumulative		Variable	Factor1	Uniqueness
	Factor1	3.4612	1.76247	0.2472	0.2472		K1	0.5066	-0.046	-0.0015	-0.1067	0.7298			Factor1	3.28004	2.40287	0.5467	0.5467		K1	0.6618	0.562			Factor1	4.14629	3.48919	0.691	0.691		K1	0.657	0.5684
	Factor2	1.69873	0.61263	0.1213	0.3686		K2	0.5581	-0.0833	-0.1206	-0.0688	0.6623			Factor2	0.87717	0.22882	0.1462	0.6929		K2	0.5329	0.7161			Factor2	0.6571	0.23434	0.1095	0.8006		K2	0.8172	0.3321
	Factor3	1.0861	0.05267	0.0776	0.4461		K3	-0.0111	0.6222	0.1586	-0.1212	0.5729			Factor3	0.64835	0.06116	0.1081	0.8009		K3	0.666	0.5565			Factor3	0.42276	0.05546	0.0705	0.871		K3	0.8276	0.3151
	Factor4	1.03343	0.0878	0.0738	0.52		K4	0.3309	-0.4825	0.1029	0.3312	0.5374			Factor4	0.58719	0.24167	0.0979	0.8988		K4	0.8314	0.3087			Factor4	0.3673	0.09475	0.0612	0.9322		K4	0.9107	0.1707
	Factor5	0.94562	0.07547	0.0675	0.5875		K5	0.6964	0.1048	-0.1272	0.1053	0.4768			Factor5	0.34552	0.08379	0.0576	0.9564		K5	0.8469	0.2827			Factor5	0.27255	0.13854	0.0454	0.9777		K5	0.9004	0.1892
	Factor6	0.87016	0.08332	0.0622	0.6497		K6	0.7583	0.0881	-0.1603	-0.1157	0.3781			Factor6	0.26172	.	0.0436	1		K6	0.8403	0.2939			Factor6	0.13401	.	0.0223	1		K6	0.8496	0.2781
	Factor7	0.78683	0.01119	0.0562	0.7059		K7	0.5927	0.0808	-0.2273	-0.0461	0.5884
	Factor8	0.77564	0.06536	0.0554	0.7613		K8	0.0622	0.6567	-0.0058	-0.1277	0.5485
	Factor9	0.71028	0.05392	0.0507	0.812		K9	0.1781	0.7034	-0.1153	0.1187	0.4461
	Factor10	0.65636	0.02459	0.0469	0.8589		K10	0.0021	0.1828	-0.4696	0.7661	0.1592
	Factor11	0.63177	0.08989	0.0451	0.904		K11	0.6884	-0.0302	0.3937	0.0489	0.3677
	Factor12	0.54188	0.12568	0.0387	0.9427		K12	0.6555	-0.0581	0.3272	0.267	0.3886
	Factor13	0.41619	0.03037	0.0297	0.9724		K13	-0.2344	0.2839	0.658	0.3771	0.2893
	Factor14	0.38582	.	0.0276	1		K14	0.6149	0.0123	0.1158	-0.1818	0.5753
	Variable	KMO													Variable	KMO										Variable	KMO
	K1	0.8829													A1	0.9186										P1	0.9467
	K2	0.9039													A2	0.8461										P2	0.933
	K3	0.6705													A3	0.8706										P3	0.9206
	K4	0.72													A4	0.8327										P4	0.8485
	K5	0.8287													A5	0.7974										P5	0.8318
	K6	0.8326													A6	0.8392										P6	0.9151
	K7	0.8729													Overall	0.8411										Overall	0.8891
	K8	0.655
	K9	0.6357
	K10	0.4141
	K11	0.7746
	K12	0.7838
	K13	0.6909
	K14	0.8604
	Overall	0.803
